# Supplementary material for: Shape-dependent performance of TiO2 nanocrystals as adsorbents for methyl orange removal
Source: Royal Society of Chemistry journal article supplement (doi:10.1039/c4ra14636k), 2015-01-01
Supplement: c4ra14636k1.pdf [file c4ra14636k1.pdf]

Supported Materials

## Shape-dependent performance of TiO<sub>2</sub> nanocrystals as adsorbents for methyl orange removal

Min Zhuang<sup>a</sup>, Yifan Zheng<sup>a</sup>, Zongjian Liu<sup>\*a</sup>, Wanzhen Huang<sup>a</sup>, Xianchao Hu<sup>a</sup>

<sup>a</sup> Institute of Industrial Catalysis, College of Chemical Engineering, Zhejiang University of Technology, Hangzhou, 300014, P.R. China;  
E-mail: zjliu@zjut.edu.cn

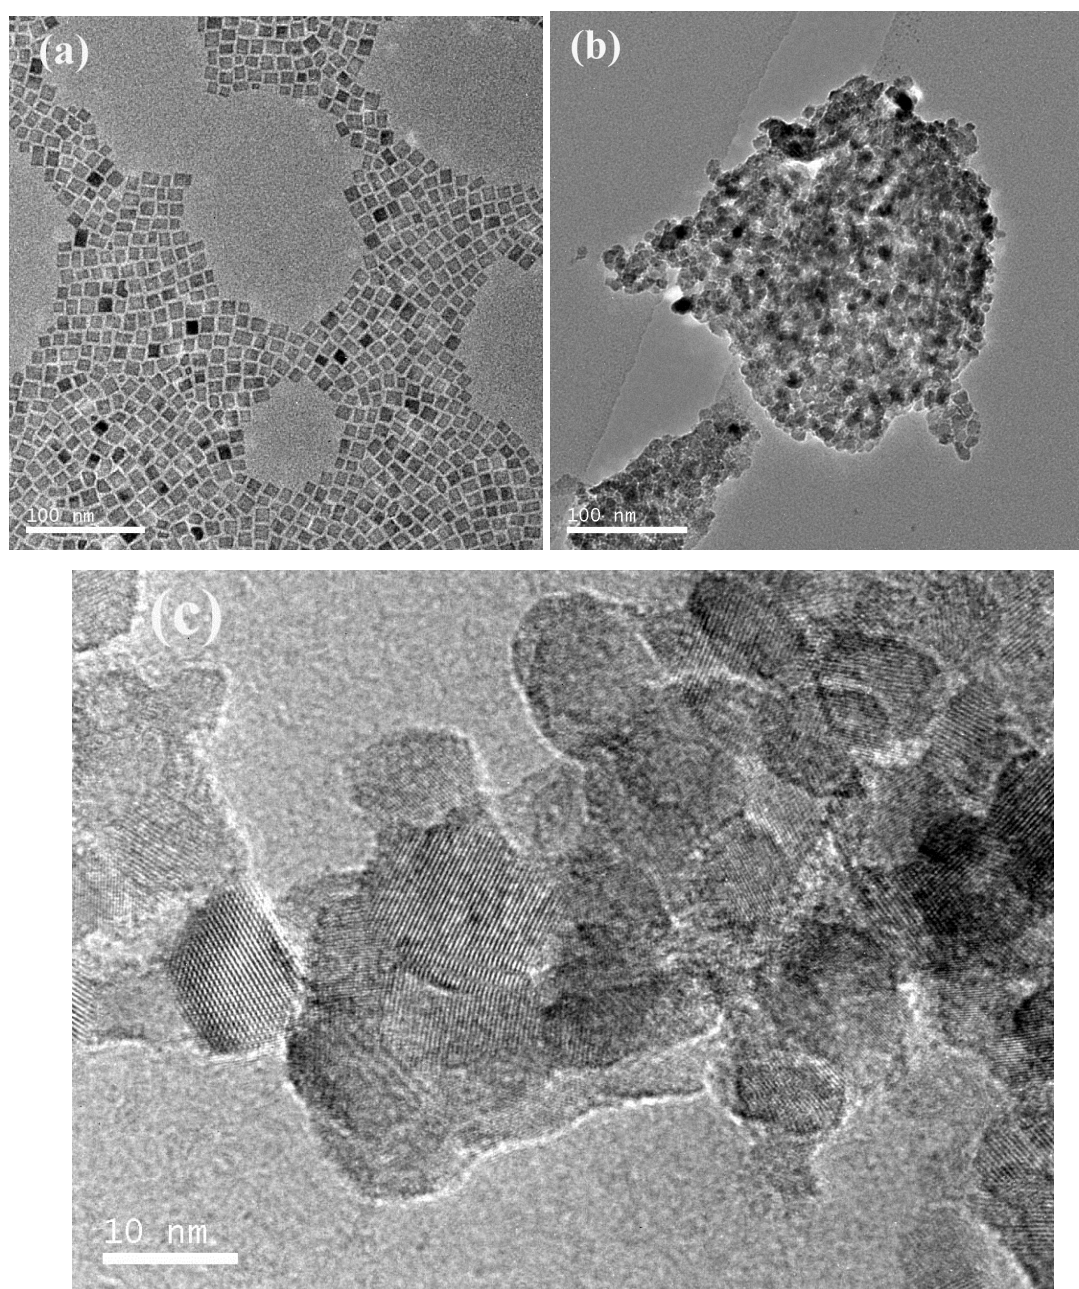

**Figure S1** TEM images of the TiO<sub>2</sub> nanoplates before and after calcined in air at a temperature of 500 °C (the heating rate is 15 °C/min) for 4 h in a tubular furnace: (a) before calcination, (b) and (c)

after calcination.
